# Supplementary material for: The therapeutic effect of mesenchymal stem cells on pulmonary myeloid cells following neonatal hyperoxic lung injury in mice
Source: Springer Nature journal article supplement (doi:10.1186/s12931-018-0816-x), 2018-06-08
Supplement: MOESM1 [file 15831928]

| Lung Macrophages Genes | Log <sub>2</sub> Fold change |           |                  |                |
|------------------------|------------------------------|-----------|------------------|----------------|
|                        | Normoxia                     | Hyperoxia | Hyperoxia -hMSCs | <i>P</i> value |
| <b>Cd86 (M1)</b>       | 0                            | +1.23     | +0.24            | 5.12           |
| <b>Socs3 (M1)</b>      | 0                            | +0.81     | +0.42            | 2.02           |
| <b>Slamf1 (M1)</b>     | 0                            | +0.22     | +2.05            | 0.20           |
| <b>Tnf (M1)</b>        | 0                            | +0.33     | -0.42            | 2.31           |
| <b>Fcgr1 (M1)</b>      | 0                            | -0.18     | -0.31            | 0.08           |
| <b>Il12b (M1)</b>      | 0                            | +0.56     | -0.10            | 5.52           |
| <b>Il1b (M1)</b>       | 0                            | +0.29     | -0.19            | 5.60           |
| <b>Il6 (M2)</b>        | 0                            | -0.76     | -1.32            | 4.46           |
| <b>Arg1 (M2)</b>       | 0                            | -0.26     | +0.83            | 0.16           |
| <b>Stat6 (M2)</b>      | 0                            | +0.75     | +0.84            | 1.06           |
| <b>Retnla (M2)</b>     | 0                            | -1.91     | -1.52            | 6.73           |
| <b>Mrc1 (M2)</b>       | 0                            | +0.58     | +0.44            | 9.33           |
| <b>Il27ra (M2)</b>     | 0                            | +0.28     | -0.21            | 0.15           |
| <b>Il12b (M2)</b>      | 0                            | +0.56     | -0.10            | 5.52           |
